# Supplementary material for: Host Chitinase 3-like-1 is a Universal Therapeutic Target for SARS-CoV-2 Viral Variants in COVID 19
Source: bioRxiv or medRxiv preprint supplement (doi:10.1101/2022.01.21.477274), 2022-02-26
Supplement: Supplementary file [file media-1.pdf]

**Table S1. Pseudoviruses containing S protein mutations of COVID variants used in this study**

| <b>Variant Name</b>                    | <b>Mutations in S protein</b>                                                                                    | <b>Pseudovirus Source (Cat #)</b>    |
|----------------------------------------|------------------------------------------------------------------------------------------------------------------|--------------------------------------|
| Alpha (B.1.1.7 and Q lineages)         | Deletions of H69, V70, and Y144;<br>N501Y, A570D, D614G, P681H<br>T716I, S982A, D1118H                           | BPS BIOSCIENCE Inc.<br>Cat#78112-1   |
| Beta (B.1.351 and descendent lineages) | L18F, D80A, D215G, R246I,<br>K417N, E484K, N501Y, D614G<br>A701V                                                 | BPS BIOSCIENCE Inc,<br>Cat #78142-1  |
| Gamma (P.1 and descendent lineages)    | L18F, T20N, P26S, D138Y, R190S<br>K417T, E484K, N501Y, D614G<br>H655Y,T1027I                                     | BPS BIOSCIENCE Inc.<br>Cart #78144-1 |
| Delta (B.1.617.2 and AY lineages)      | T19R, G142D, 156/157 Deletion,<br>R158G, L452R,T478K,<br>D614G, P681R, D950N                                     | BPS Bioscience Inc.<br>Cat# 78216-1  |
| Omicron (B.1.1.529 and BA lineages)    | S371L, G339D, S375F, S373P,<br>K417N, N440K, G446S, S477N,<br>T478K, D614G, E484A, Q498R,<br>H505Y, N501Y, Q493R | eEnzyme.com<br>SCV2-PsV-Omicron      |
